# Supplementary material
Source: Springer Nature journal article supplement (https://www.springermedizin.de/resource/supplementary/12903_2012_300_MOESM2_ESM.pdf/9516570)

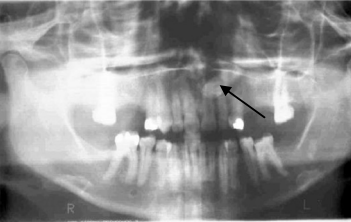

**A**

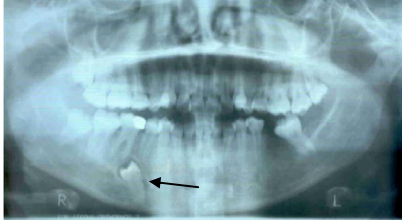

**B**

Supplement: MOESM2 [file 9516570]
